# Supplementary material for: PNA forms an i-motif
Source: Royal Society of Chemistry journal article supplement (doi:10.1039/b510405j), 2005-01-01
Supplement: b510405j.pdf [file b510405j.pdf]

## Supporting Information

### PNA forms an I-motif.

Yamuna Krishnan-Ghosh, Elaine Stephens and Shankar Balasubramanian\*.

University Chemical Laboratories, University of Cambridge, Lensfield Road, Cambridge CB2 1EW, UK.

### Synthesis and Characterization of p(C<sub>5</sub>T).

All chemicals were obtained from Sigma-Aldrich unless otherwise stated. Fmoc protected PNA monomers and coupling reagents for solid phase PNA synthesis were obtained from Applied Biosystems (Cheshire, UK). Resins were obtained from Novabiochem. Solvents and other chemicals used were of analytical grade. Milli-Q water was used for all aqueous chemistry. Nano-electrospray ionization mass spectra (Nano-ESI-MS) were recorded on a Q-TOF-1 mass spectrometer (Micromass, UK). The PNA oligomer was synthesized on tentagel resin with a Wang linker using standard protocols employing Fmoc chemistry. (i) Christensen, L., Fitzpatrick, R., Gildea, B., Petersen, K.H., Hansen, H.F., Koch, T., Egholm, M., Buchardt, O., Nielsen, P.E., Coull, J. and Berg, R.H. *J. Peptide Sci.* 1995, **3**, 175-183. (ii) Koch, T., Hansen, H.F., Anderson, P., Larsen, T., Batz, H.G., Otteson, K. and Orum, H. *J. Peptide Res.* 1997, **49**, 80-88.) Deprotection and cleavage from the resin was achieved simultaneously with 95/2.5/2.5 TFA/ water/TIS. The solvent was evaporated under reduced pressure and precipitated using dry ether. The PNA was purified by RP-HPLC. **p(C<sub>5</sub>T)**: retention time = 11.8 min. ESI-MS **p(C<sub>5</sub>T)** monoisotopic [M+H]<sup>+</sup> 1669.65 (calc 1669.66), [M+2H]<sup>2+</sup> 835.3 (calc 835.33), [M+3H]<sup>3+</sup> 557.20 (calc 557.22). **p(C<sub>5</sub>T)** was stored as a 0.3 M aqueous solution at 4°C.

### Expanded Mass Spectra of M<sub>2</sub><sup>3+</sup> and M<sub>4</sub><sup>5+</sup>

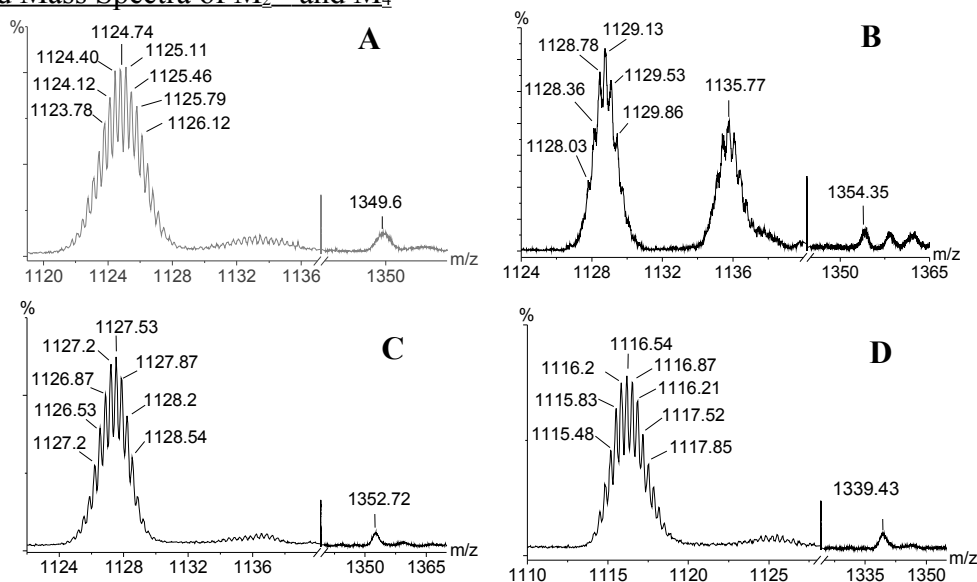

### MS-MS on the Tetramer, M<sub>4</sub><sup>5+</sup>:

The unsymmetrical  $M_4^{5+}$  peak is comprised of two non-identical intercalated subunits, one of which corresponds to the dimer,  $M_2^{3+}$ , as evidenced by MS-MS on  $M_4^{5+}$ . MS-MS on the peak at  $m/z$  1336 at energies of 30 eV yielded peaks corresponding to  $M_2^{3+}$  and

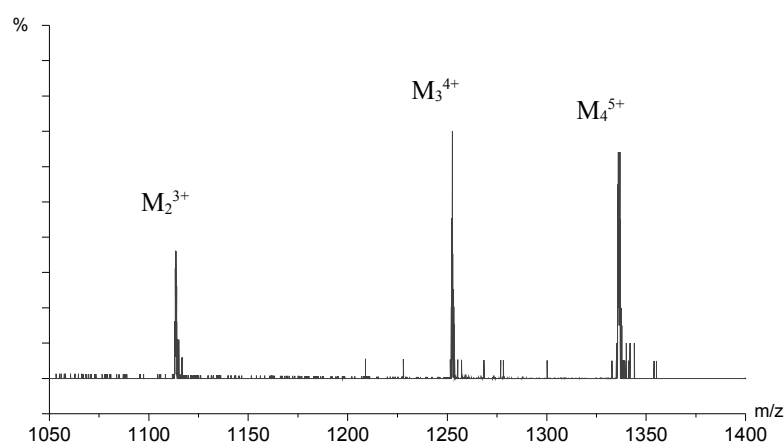

Figure SI-E. MS-MS on the tetramer species  $M_4^{5+}$  at 30 eV.

$M_3^{4+}$  (Figure SI-E) in addition to  $M^+$ . However at higher energies, (50-60 eV) only  $M^+$  and  $M^{2+}$  were observed (not shown). The peaks corresponding to  $M_2^{3+}$ ,  $M_3^{4+}$  were always observed simultaneously. This suggests that the removal of one strand from the tetramer (to give  $M_3^{4+}$ ) just as easily releases the second strand (leaving behind  $M_2^{3+}$ ) with the simultaneous appearance of monomeric **p(C<sub>5</sub>T)**. This is consistent with an i-motif type arrangement, where removal of one of the four strands leaves behind a dimer with a loosely associated third strand. Therefore for clarity, in the main manuscript we have chosen to present the analysis on  $M_2^{3+}$  rather than  $M_4^{5+}$  to elucidate hydrogen bonding in the component subunit.

#### **$M_4^{5+}$ forms an I-motif – H/D exchange analysis**

The putative structure of  $M_4^{5+}$ , the unsymmetrically charged tetramer is shown below. From the peak intensities, this tetramer is a relatively minor population. It consists of two dimeric subunits (**F**) and (**G**). (**F**) is a dimer with a structure identical to  $M_2^{3+}$  (Chart 1, Main M/S) with 5 protons and 5 C-C<sup>+</sup> base pairs. (**G**) is a dimer ( $M_2^{2+}$ ) with 4 buried protons and hence, 4 C-C<sup>+</sup> base pairs. Thus,  $M_4^{5+}$ , the unsymmetrically charged tetramer represents a small population of an i-motif where one C-C<sup>+</sup> pair out of a total ten has frayed. In fact, H/D exchange revealed that  $M_4^{5+}$  had ~9 protons that were impossible to exchange (See SI-Table 1 (3)-(4)).

**SI-Table 1.** Observed  $m/z$  and associated molecular weight (MW) as determined by Nano-ESI-MS before and after H/D exchange.

| Sample | Observed $m/z$<br>( $M_4^{5+}$ ) | Computed MW<br>of $M_4^{5+}$ | Expected <sup>a</sup> $m/z$<br>of $M_4^{5+}$ | Expected <sup>a</sup><br>MW of $M_4^{5+}$ | Sites exchanged<br>in $M_4^{5+}$ |
|--------|----------------------------------|------------------------------|----------------------------------------------|-------------------------------------------|----------------------------------|
| (1)    | 1336.18                          | 6680.9 ± 1.06                | 1335.93                                      | 6679.65                                   | 0                                |
| (2)    | 1349.6                           | 6748.0 ± 1.56                | 1349.21                                      | 6746.05                                   | 66                               |
| (3)    | 1354.35                          | 6772.2 ± 1.13                | 1354.64                                      | 6773.20                                   | 94                               |
| (4)    | 1352.72                          | 6763.6 ± 1.52                | 1352.83                                      | 6764.15                                   | 85                               |
| (5)    | 1339.43                          | 6697.15 ± 1.02               | 1339.55                                      | 6697.75                                   | 66 <sup>c</sup>                  |

<sup>a</sup> Molecular weight calculated assuming the number of exchanges listed in the right-most column;

<sup>b</sup>Number of deuteriums that have undergone back-exchange (D/H) in H<sub>2</sub>O.

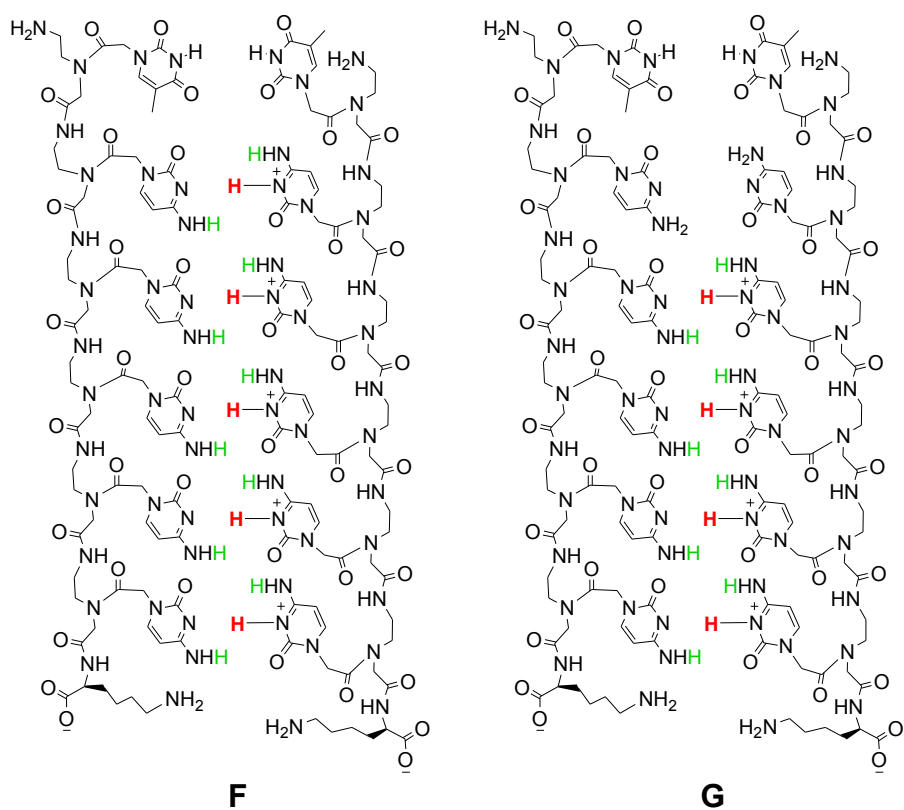

**SI- Figure F&G:**  $M_4^{5+}$  is composed of two duplexes **F** and **G**, with 5 and 4 C-C<sup>+</sup> base pairs respectively. The green hydrogens are involved in neutral H-bonds and exchange upon heating; The red hydrogens are involved in buried, charged H-bonds and were not exchanged even upon heating.
